# Supplementary material for: Echoes on the Internet: Dissecting Social Media Silos through Behavioral and Personality Markers
Source: Research Square preprint supplement (doi:10.21203/rs.3.rs-5519950/v1), 2025-03-21
Supplement: Supplementary file 1 [file f3821aa97986e9bc550aec35.docx]

# Supporting Information

# Appendix A. Echo chamber detection

**A.1 Echo chamber detection model**

Here, we define an echo chamber as a group of users who have participated in spreading at least two Weibos on the same topic1. We let the users be the set of all users involved in retweeting the Weibo. Then, we compute a set of echo chambers, where echo chamber is the intersection of users and , corresponding a given pair of Weibos and , respectively. We assume that a user can participate in more than one echo chamber, and each echo chamber has at least two members. Using this approach, we construct the echo chamber identification model algorithm as follows.

| Algorithm 1: Echo chamber identification model |
| --- |
| Input: Event set , retweet user set .  Output: The set of echo chambers , the set of users who retweeted the event . |
| 1. Initial as null set 2. For all event in : 3. Initial as null set 4. For all user in 5. If the user retweet the event 6. Add to 7. End If 8. End For 9. End For 10. For all -event combination (2) in : 11. If ： 12. Add to 13. End If 14. End For |

The echo chamber identification model begins by executing a loop to find all users who retweeted the event as a set (Lines 2-9). Using these sets, we enumerated all combinations of events to identify all echo chambers (Line 10). If the intersection in the combination is not a null set, then this n-event combination can be regarded as an echo chamber (Lines 11-13). Note that by calculating the cases with n = 3 and 4, we found that the average membership of echo chambers containing 3 or 4 common events was 3.19 and 2.12, respectively. This is probably too small to lose the value of analysis. To avoid this over-screening bias, we identified an echo chamber based on 2 common events, i.e., n = 2. Therefore, the upper bound of n is set to 2. To analyze the complexity of echo chamber identification model, we assume that the sizes of and are and , respectively. The complexity of finding is . In the identification step, we enumerate all n-event combinations in all events. The maximum loop times is the combination of 2 events, which can be expressed as a seventh-degree polynomial and far more complex than the former operation. Thus, the complexity of the model is .

**A. 2 Echo chamber effect measurement**

Echo chambers exhibit several critical characteristics. Firstly, users are subjected to selective exposure, whereby they are primarily exposed to content that aligns with their pre-existing beliefs. Secondly, users tend to be surrounded by individuals with similar characteristics, known as homophily 2. To verify whether the identified echo chambers manifest these properties, we evaluated them using two metrics: selective exposure and homophily.

**A. 2.1 Selective exposure**

Selective exposure has a significant impact on social media content consumption, with varying information dissemination dynamics across different social media platforms 3. Research on selective exposure emphasizes the fact that, compared to face-to-face interactions, social networks display a greater diversity of viewpoints. When social media grants users the power of choice, they tend to consume content that aligns with their personal preferences 4. Consequently, we have developed a method to determine whether selective exposure occurs within echo chambers. In other words, by analyzing the polarity of opinions in the comment texts of echo chamber participants, we can ascertain the extent of selective exposure among users on social media 5,6.

Opinion mining is a significant research area in the field of Natural Language Processing (NLP). Its purpose is to extract and process textual data by conducting sentiment analysis on textual documents to obtain information and further detect attitudes toward objects or individuals. The sub-processes involved in opinion mining utilize techniques such as subjectivity, opinion orientation, and target detection to identify data suitable for sentiment analysis from documents. This facilitates the evaluation of users’ emotions, attitudes, viewpoints, and evaluations conveyed towards products or public figures 7.

Within this context, the Baidu AI Comment Opinion Extraction feature serves as a natural language processing service provided by the Baidu AI platform. It aims to assist developers and businesses in extracting valuable opinion information from user comments or other textual data. Leveraging advanced machine learning and deep learning technologies, this feature automatically analyzes the opinion orientation (positive, negative, or neutral) within the text and identifies associated keywords or phrases. Consequently, it offers users more accurate results in opinion analysis. In this paper, we utilized the Baidu AI Comment Opinion Extraction API to score user comments in an echo chamber 8,9. The output values were set within the range of [-1, 1], where -1 represented an extremely negative opinion, 1 represented an extremely positive opinion, and 0 represented neutrality. However, in our empirical study, we observed that some users who were mentioned (@ users) or users who were retweeted did not provide any comments. As a result, we were unable to classify the polarity of their viewpoints. In light of this, we calculated the average polarity score of the last ten comments from @ users on the same topic as their overall polarity. For other users who did not fall into this category, their polarity remained unknown.

**A. 2.2 Homophily**

Homophily, the propensity for individuals to form connections with others who share similar beliefs or orientations, is a well-documented phenomenon 10,11. In this study, we devised a method to quantify heterogeneity, enabling us to examine the potential presence of homophily among echo chamber participants. This concept is characterized as the ratio of members who endorse and oppose a particular opinion 10. The measurement method is illustrated in Equation (1):

The observed frequency of negative opinions is represented by , while denotes the observed frequency of positive opinions among the participants in the echo chamber. The measure yields a linear range between 0 and 1. This metric provides values on a linear scale, ranging from perfect homogeneity (H = 0) to perfect heterogeneity (H = 1).

# Appendix B. Echo chamber detection

This part of the research has been published in previous work, please refer to "Personality Traits and Their Influence on Echo Chamber Formation in Social Media: A Comparative Study of Twitter and Weibo" 12.

**B.1 Echo chamber network analysis**

We cleaned the initial data, removing 25% of invalid information and text from trolls and bot accounts, resulting in 2,249 original posts and 2,916,869 user IDs, retweets, and comments. We retained the top 30 posts per topic as the event set, with each topic corresponding to an interaction network. The final data included 120 original posts, 1,024,276 user IDs, retweets, comments, and @users. We also collected 789,596 original posts from 20,000 active users for personality trait model training. To reduce data volume and complexity, we identified and validated echo chambers before processing original posts for personality trait analysis. Dataset details can be found in Table 1.

**Table 1.** Dataset analysis results.

| **Dataset platform** | **Topics** | **Number of Posts** | **Number of Users** | **Number of Retweets** | **Number of Comments** | **Time period** |
| --- | --- | --- | --- | --- | --- | --- |
| Weibo | International | 30 | 256069 | 116793 | 139276 | 1/01/2021-31/12/2021 |
| Sport | 30 | 249793 | 109742 | 140051 |
| Twitter | International | 30 | 261002 | 127047 | 133955 |
| Sport | 30 | 257412 | 109863 | 147549 |

Using the echo chamber recognition algorithm 1, we calculated the number of echo chambers and members with Python. The average number of members in 2-event echo chambers is 6,877, about 7.5 times more than in 3-event chambers, while 4-event and 5-event chambers have insignificant participant numbers. To prevent excessive user screening, we selected the 2-event echo chamber for our study, resulting in a network of 596 echo chambers with 6,877 members.

**B.1.1Echo chamber effects**

Selective exposure: After excluding members whose opinion polarity is marked as unknown, Figure 1 shows the distribution of selective exposure under the dimensions of platform and topic. Positive, neutral, and negative selective exposure scores are shown in light to dark colors, and the values are in the form of percentages. Both positive and negative selective exposure are considered to be an indication of polarization, which exceeds 80% in all four groups, it was not difficult to find that the opinions of echo chamber members showed a strong polarization in both the platform and the topic dimensions. This situation indicated that the identified echo chambers have significant selective exposure 13.


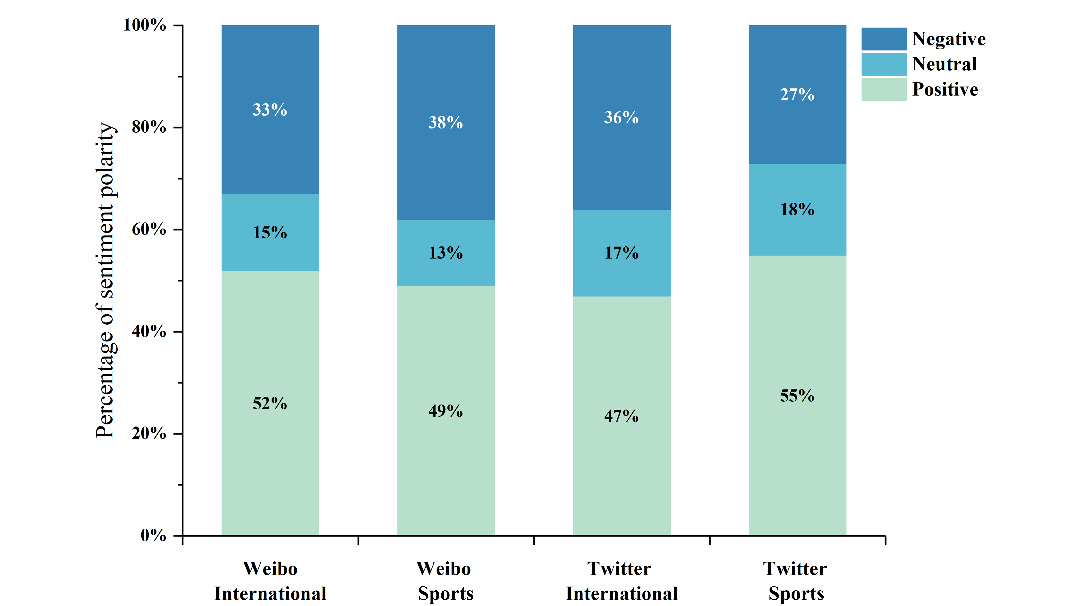


**Figure 1 Opinion polarity distribution of echo chambers.**


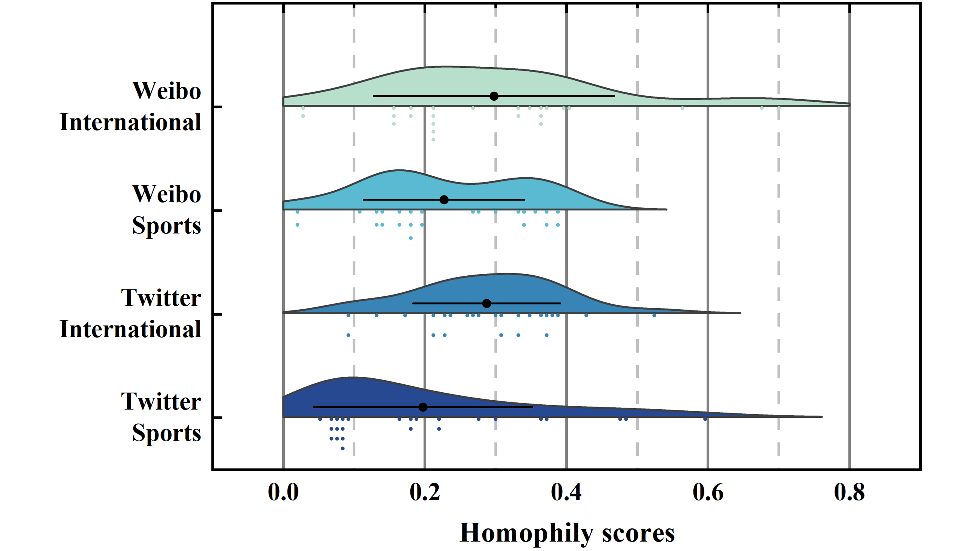
Homophily: Figure 2 shows the distribution of homogeneity scores in the two dimensions of platform and topic, with the position of the dot in the black horizontal line indicating the average homophily scores, and the vertical height indicating the frequency of homogeneity scores. As shown in Figure 2, the average homophily for the Weibo international and Weibo sports are 0.29 and 0.23, and the average homophily for the Twitter international and Twitter sports topics are 0.28 and 0.19. All echo chamber members have homophily scores below 0.3. This result suggested that echo chamber members tend to hold similar views.

**Figure 2. Homophily distribution of echo chambers.**

# References

1 Gao, Y., Sun, Y., Zhang, L., Liu, F. & Gao, L. Identifying key rumor refuters on social media. *Expert Systems with Applications*, 120603 (2023).

2 Rhodes, S. C. *Echo Chambers and Misinformation: How Social Media Use Conditions Individuals to Believe Fake News*. (Washington State University, 2019).

3 Cinelli, M., De Francisci Morales, G., Galeazzi, A., Quattrociocchi, W. & Starnini, M. The echo chamber effect on social media. *Proceedings of the National Academy of Sciences* **118**, e2023301118 (2021).

4 Vaccari, C. *et al.* Of Echo Chambers and Contrarian Clubs: Exposure to Political Disagreement Among German and Italian Users of Twitter. *Social Media + Society* **2**, 1-24, doi:10.1177/2056305116664221 (2016).

5 Gao, Y., Sun, Y., Liu, F., Gao, L. & Jin, M. Echo chamber effects of public opinion propagation in social networks. *Information studies: Theory & Application* **45**, 58 (2022).

6 Gao, Y., Liu, F. & Gao, L. Echo chamber effects on short video platforms. *Scientific Reports* **13**, 6282 (2023).

7 Da'u, A., Salim, N., Rabiu, I. & Osman, A. Recommendation system exploiting aspect-based opinion mining with deep learning method. *Information Sciences* **512**, 1279-1292 (2020).

8 Gao, Z. *et al.* in *MATEC Web of Conferences.* 05016 (EDP Sciences).

9 Qiu, G., Wang, C., Bu, J., Liu, K. & Chen, C. in *Proc. WWW 2008 Workshop NLP Challenges in the Information Explosion Era.* (Citeseer).

10 Williams, H. T., McMurray, J. R., Kurz, T. & Lambert, F. H. Network analysis reveals open forums and echo chambers in social media discussions of climate change. *Global environmental change* **32**, 126-138 (2015).

11 Del Vicario, M. *et al.* The spreading of misinformation online. *Proceedings of the national academy of Sciences* **113**, 554-559 (2016).

12 Song, X., Guo, S. & Gao, Y. Personality traits and their influence on Echo chamber formation in social media: a comparative study of Twitter and Weibo. *Frontiers in Psychology* **15**, 1323117 (2024).

13 Choi, D., Chun, S., Oh, H., Han, J. & Kwon, T. T. Rumor propagation is amplified by echo chambers in social media. *Scientific reports* **10**, 310 (2020).
